# Supplementary material
Source: ML conference proceedings conference paper supplement (https://openaccess.thecvf.com/content/ICCV2023/html/Cheng_Score_Priors_Guided_ICCV_2023_paper.html)
Supplement: Supplementary file 1 [file Cheng_Score_Priors_Guided_ICCV_2023_supplemental.pdf]

# Supplementary Material for Score Priors Guided Deep Variational Inference for Unsupervised Real-World Single Image Denoising

Jun Cheng, Tao Liu, Shan Tan\*  
Huazhong University of Science and Technology, Wuhan, China  
{jcheng24, hust\_liutao, shantan}@hust.edu.cn

## S1. Derivations

### S1.1. Proof of Theorem 1

*Proof.* Suppose a noisy observation  $\tilde{\mathbf{x}} = \mathbf{x} + \mathbf{n} \in \mathbb{R}^N$  where  $\mathbf{n} \sim \mathcal{N}(\mathbf{0}, \Sigma)$  has the zero mean and covariance  $\Sigma$ , and  $\mathbf{x} \sim p(\mathbf{x})$ . Then the density  $p(\tilde{\mathbf{x}})$  is  $p(\tilde{\mathbf{x}}) = \int \mathcal{N}(\mathbf{x}, \Sigma)p(\mathbf{x})d\mathbf{x}$ . The gradient of  $p(\tilde{\mathbf{x}})$  is

$$\begin{aligned}\nabla_{\tilde{\mathbf{x}}}p(\tilde{\mathbf{x}}) &= \nabla_{\tilde{\mathbf{x}}} \int \frac{1}{(2\pi)^{0.5N}|\Sigma|^{0.5}} \exp\left\{-\frac{1}{2}(\tilde{\mathbf{x}} - \mathbf{x})^T \Sigma^{-1}(\tilde{\mathbf{x}} - \mathbf{x})\right\} p(\mathbf{x})d\mathbf{x} \\ &= \int \frac{1}{(2\pi)^{0.5N}|\Sigma|^{0.5}} \exp\left\{-\frac{1}{2}(\tilde{\mathbf{x}} - \mathbf{x})^T \Sigma^{-1}(\tilde{\mathbf{x}} - \mathbf{x})\right\} \nabla_{\tilde{\mathbf{x}}} \left(-\frac{1}{2}(\tilde{\mathbf{x}} - \mathbf{x})^T \Sigma^{-1}(\tilde{\mathbf{x}} - \mathbf{x})\right) p(\mathbf{x})d\mathbf{x} \\ &= \int \Sigma^{-1}(\mathbf{x} - \tilde{\mathbf{x}})p(\tilde{\mathbf{x}}|\mathbf{x})p(\mathbf{x})d\mathbf{x} = \Sigma^{-1} \int (\mathbf{x} - \tilde{\mathbf{x}})p(\tilde{\mathbf{x}}, \mathbf{x})d\mathbf{x} = \Sigma^{-1} \int (\mathbf{x} - \tilde{\mathbf{x}})p(\mathbf{x}|\tilde{\mathbf{x}})p(\tilde{\mathbf{x}})d\mathbf{x}\end{aligned}\quad (\text{S1})$$

Multiplying both sides of (S1) by  $\frac{1}{p(\tilde{\mathbf{x}})}$  gives

$$\frac{\nabla_{\tilde{\mathbf{x}}}p(\tilde{\mathbf{x}})}{p(\tilde{\mathbf{x}})} = \nabla_{\tilde{\mathbf{x}}} \log p(\tilde{\mathbf{x}}) = \Sigma^{-1} \int (\mathbf{x} - \tilde{\mathbf{x}})p(\mathbf{x}|\tilde{\mathbf{x}})d\mathbf{x} = \Sigma^{-1} (\mathbb{E}_{p(\mathbf{x}|\tilde{\mathbf{x}})}(\mathbf{x}) - \tilde{\mathbf{x}}) \quad (\text{S2})$$

where  $\mathbb{E}_{p(\mathbf{x}|\tilde{\mathbf{x}})}(\mathbf{x})$  is the conditional mean for noisy input  $\tilde{\mathbf{x}}$  corrupted by structured Gaussian noise. The proof is completed.  $\square$

### S1.2. Score priors for the optimization of $\text{KL}(q(\mathbf{x})||p(\mathbf{x}))$

Assume variational posterior  $q(\mathbf{x}) = \prod_{i=1}^N \mathcal{N}(\mu_i, \sigma_i^2)$ , then we have

$$\text{KL}(q(\mathbf{x})||p(\mathbf{x})) \approx \mathbb{E}_{q(\mathbf{x})} \log q(\mathbf{x}) - \frac{1}{M} \sum_{m=1}^M \log p(\mathbf{x}_m) = -\frac{1}{2} \sum_{i=1}^N \log \sigma_i^2 + \text{const} - \frac{1}{M} \sum_{m=1}^M \log p(\mathbf{x}_m) \quad (\text{S3})$$

where  $\mathbf{x}_m = \boldsymbol{\mu} + \boldsymbol{\sigma} \odot \boldsymbol{\epsilon}$ ,  $\boldsymbol{\epsilon} \sim \mathcal{N}(\mathbf{0}, I)$ , and  $\odot$  denotes element-wise multiplication.

Note that  $\log p(\mathbf{x}_m)$  is not directly computable, but its derivatives can be obtained with the help of score functions from MMSE Non- *i.i.d* Gaussian denoisers, that is

$$\nabla_{\boldsymbol{\mu}} \text{KL}(q(\mathbf{x})||p(\mathbf{x})) \approx \nabla_{\boldsymbol{\mu}} \left(-\frac{1}{M} \sum_{m=1}^M \log p(\mathbf{x}_m)\right) = -\frac{1}{M} \sum_{m=1}^M \nabla_{\mathbf{x}_m} \log p(\mathbf{x}_m) \odot \nabla_{\boldsymbol{\mu}} \mathbf{x}_m = -\frac{1}{M} \sum_{m=1}^M \nabla_{\mathbf{x}_m} \log p(\mathbf{x}_m) \quad (\text{S4})$$

$$\begin{aligned}\nabla_{\boldsymbol{\sigma}^2} \text{KL}(q(\mathbf{x})||p(\mathbf{x})) &\approx \nabla_{\boldsymbol{\sigma}^2} \left(-\frac{1}{2} \sum_{i=1}^N \log \sigma_i^2 - \frac{1}{M} \sum_{m=1}^M \log p(\mathbf{x}_m)\right) = -\frac{1}{2\boldsymbol{\sigma}^2} - \frac{1}{M} \sum_{m=1}^M \nabla_{\mathbf{x}_m} \log p(\mathbf{x}_m) \odot \nabla_{\boldsymbol{\sigma}^2} \mathbf{x}_m \\ &= -\frac{1}{2\boldsymbol{\sigma}^2} - \frac{1}{M} \sum_{m=1}^M \nabla_{\mathbf{x}_m} \log p(\mathbf{x}_m) \odot \boldsymbol{\epsilon}\end{aligned}\quad (\text{S5})$$

We can then replace the score in (S4) and (S5) with

$$\nabla_{\mathbf{x}_m} \log p(\mathbf{x}_m) = (\mathbb{E}(X|\mathbf{x}_m) - \mathbf{x}_m) \odot \frac{1}{\sigma^2} \approx (\mathcal{G}(\mathbf{x}_m) - \mathbf{x}_m) \odot \frac{1}{\sigma^2} \in \mathbb{R}^N \quad (\text{S6})$$

where  $\mathbb{E}(X|\mathbf{x}_m)$  is the conditional expectation given noisy input  $\mathbf{x}_m$  and  $\mathcal{G}(\mathbf{x}_m)$  is the output of a MMSE Non-*i.i.d* Gaussian denoiser  $\mathcal{G}$ , which serves as the approximation of  $\mathbb{E}(X|\mathbf{x}_m)$ .

### S1.3. Derivations of the complete ELBO objective and its components

The KL divergence between the trivial variational posterior  $q(X, \Phi, Z, \Omega)$  and the true posterior  $p(X, \Phi, Z, \Omega|\mathbf{y})$  is

$$\begin{aligned} \text{KL}(q(X, \Phi, Z, \Omega)||p(X, \Phi, Z, \Omega|\mathbf{y})) &= \int_{X, \Phi, Z, \Omega} \log \frac{q(X, \Phi, Z, \Omega)}{p(X, \Phi, Z, \Omega|\mathbf{y})} q(X, \Phi, Z, \Omega) dX d\Phi dZ d\Omega \\ &= \int_{X, \Phi, Z, \Omega} \log \frac{q(X, \Phi, Z, \Omega)p(\mathbf{y})}{p(\mathbf{y}|X, \Phi, Z, \Omega)p(X, \Phi, Z, \Omega)} q(X, \Phi, Z, \Omega) dX d\Phi dZ d\Omega \\ &= \log p(\mathbf{y}) - \underbrace{(\mathbb{E}_{q(X, \Phi, Z, \Omega)}(\log p(\mathbf{y}|X, \Phi, Z, \Omega)) - \text{KL}(q(X, \Phi, Z, \Omega)||p(X, \Phi, Z, \Omega)))}_{\text{ELBO}} \end{aligned} \quad (\text{S7})$$

As  $\text{KL}(q(X, \Phi, Z, \Omega)||p(X, \Phi, Z, \Omega|\mathbf{y})) \geq 0$  and  $\log p(\mathbf{y})$  is not computable, we instead maximize the Evidence Low Bound (ELBO) in Eq. (S7).  $\text{KL}(q(X, \Phi, Z, \Omega)||p(X, \Phi, Z, \Omega))$  in the ELBO can be further decomposed into

$$\begin{aligned} \text{KL}(q(X, \Phi, Z, \Omega)||p(X, \Phi, Z, \Omega)) &= \int_{X, \Phi, Z, \Omega} \log \frac{q(X, \Phi, Z, \Omega)}{p(X, \Phi, Z, \Omega)} q(X, \Phi, Z, \Omega) dX d\Phi dZ d\Omega \\ &= \int_{X, \Phi, Z, \Omega} \log \frac{q(X|Z)q(\Phi|Z)q(Z)q(\Omega)}{p(X|Z)p(\Phi|Z)p(Z|\Omega)p(\Omega)} q(X|Z)q(\Phi|Z)q(Z)q(\Omega) dX d\Phi dZ d\Omega \\ &= \mathbb{E}_{q(X|Z)} \mathbb{E}_{q(\Phi|Z)} \mathbb{E}_{q(Z)} \mathbb{E}_{q(\Omega)} \left( \log \frac{q(X|Z)}{p(X|Z)} + \log \frac{q(\Phi|Z)}{p(\Phi|Z)} + \log \frac{q(Z)}{p(Z|\Omega)} + \log \frac{p(\Omega)}{p(\Omega)} \right) \\ &= \mathbb{E}_{q(Z)} \mathbb{E}_{q(\Omega)} \left( \text{KL}(q(X|Z)||p(X|Z)) + \text{KL}(q(\Phi|Z)||p(\Phi|Z)) + \log \frac{q(Z)}{p(Z|\Omega)} + \log \frac{q(\Omega)}{p(\Omega)} \right) \\ &= \underbrace{\mathbb{E}_{q(Z)} \text{KL}(q(X|Z)||p(X|Z))}_{\mathcal{L}_2} + \underbrace{\mathbb{E}_{q(Z)} \text{KL}(q(\Phi|Z)||p(\Phi|Z))}_{\mathcal{L}_3} \\ &\quad + \underbrace{\mathbb{E}_{q(\Omega)} \text{KL}(q(Z)||p(Z|\Omega))}_{\mathcal{L}_4} + \underbrace{\text{KL}(q(\Omega)||p(\Omega))}_{\mathcal{L}_5} \end{aligned} \quad (\text{S8})$$

with each component derived as:

$$\begin{aligned} \mathbb{E}_{q(Z)} (\text{KL}(q(\Phi|Z)||p(\Phi|Z))) &= \mathbb{E}_{q(Z)q(\Phi|Z)} \log \left( \prod_{i=1}^N \prod_{k=1}^K \left( \frac{\phi_{ik}^{\hat{\alpha}_{ik}-1} \exp^{-\hat{\beta}_{ik}\phi_{ik}} \hat{\beta}_{ik}^{\hat{\alpha}_{ik}}}{\Gamma(\hat{\alpha}_{ik})} \right)^{z_{ik}} \left( \frac{\Gamma(\alpha)}{\phi_{ik}^{\alpha-1} \exp^{-\beta\phi_{ik}} \beta^\alpha} \right)^{z_{ik}} \right) \\ &= \int_{\Phi, Z} \sum_{i=1}^N \sum_{k=1}^K z_{ik} \log \left( \frac{\phi_{ik}^{\hat{\alpha}_{ik}-1} \exp^{-\hat{\beta}_{ik}\phi_{ik}} \hat{\beta}_{ik}^{\hat{\alpha}_{ik}}}{\Gamma(\hat{\alpha}_{ik})} \frac{\Gamma(\alpha)}{\phi_{ik}^{\alpha-1} \exp^{-\beta\phi_{ik}} \beta^\alpha} \right) q(\Phi|Z)q(Z) d\Phi dZ \\ &= \int_Z \sum_{i=1}^N \sum_{k=1}^K z_{ik} \left( \log \frac{\Gamma(\alpha)}{\Gamma(\hat{\alpha}_{ik})} + (\hat{\alpha}_{ik} - \alpha)(\psi(\hat{\alpha}_{ik}) - \log \hat{\beta}_{ik}) + (\beta - \hat{\beta}_{ik}) \frac{\hat{\alpha}_{ik}}{\hat{\beta}_{ik}} + \hat{\alpha}_{ik} \log \hat{\alpha}_{ik} - \alpha \log \beta \right) q(Z) dZ \\ &= \sum_{i=1}^N \sum_{k=1}^K \pi_{ik} \left( \log \frac{\Gamma(\alpha)}{\Gamma(\hat{\alpha}_{ik})} + (\hat{\alpha}_{ik} - \alpha)\psi(\hat{\alpha}_{ik}) + \alpha \log \frac{\hat{\beta}_{ik}}{\beta} + (\beta - \hat{\beta}_{ik}) \frac{\hat{\alpha}_{ik}}{\hat{\beta}_{ik}} \right) \end{aligned} \quad (\text{S9})$$

where  $\Gamma(\cdot)$  and  $\psi(\cdot)$  denotes gamma function and digamma function, respectively.

$$\begin{aligned}
\mathbb{E}_{q(Z)} (\text{KL}(q(X|Z)||p(X|Z))) &= \int_{X,Z} \log \frac{\prod_{i=1}^N \prod_{k=1}^K (\mathcal{N}(\mu_{ik}, \sigma_{ik}^2))^{z_{ik}}}{\prod_{i=1}^N \prod_{k=1}^K p(x_{ik})^{z_{ik}}} q(X|Z) q(Z) dX dZ \\
&= \int_Z \left( \sum_{k=1}^K \sum_{i=1}^N -\frac{1}{2} z_{ik} (\log \sigma_{ik}^2 + \log 2\pi) - \sum_{k=1}^K \sum_{i=1}^N z_{ik} \mathbb{E}_{q(x_{ik})} \log p(x_{ik}) \right) q(Z) dZ \quad (\text{S10}) \\
&= \sum_{k=1}^K \sum_{i=1}^N -\frac{1}{2} \pi_{ik} \log \sigma_{ik}^2 - \sum_{k=1}^K \sum_{i=1}^N \pi_{ik} \mathbb{E}_{q(x_{ik})} \log p(x_{ik}) + C
\end{aligned}$$

where  $C = \sum_{k=1}^K \sum_{i=1}^N -\frac{1}{2} z_{ik} \log 2\pi$ .

$$\begin{aligned}
\mathbb{E}_{q(\Omega)} (\text{KL}(q(Z)||p(Z|\Omega))) &= \int_{Z,\pi} \log \frac{\prod_{i=1}^N \prod_{k=1}^K \pi_{ik}^{z_{ik}}}{\prod_{i=1}^N \prod_{k=1}^K \omega_{ik}^{z_{ik}}} q(Z) dZ q(\Omega) d\Omega \\
&= \sum_{i=1}^N \sum_{k=1}^K \pi_{ik} \left( \log \pi_{ik} - \psi(\hat{d}_{ik}) + \psi\left(\sum_{k=1}^K \hat{d}_{ik}\right) \right) \quad (\text{S11})
\end{aligned}$$

$$\begin{aligned}
\text{KL}(q(\Omega)||p(\Omega)) &= \int_{\Omega} \log \frac{\prod_{i=1}^N Z_{\text{Dir}}(\hat{\mathbf{d}}_i) \prod_{k=1}^K \omega_{ik}^{\hat{d}_{ik}-1}}{\prod_{i=1}^N Z_{\text{Dir}}(\mathbf{d}) \prod_{k=1}^K \omega_{ik}^{d_k-1}} q(\Omega) d\Omega \\
&= \sum_{i=1}^N \log \frac{Z_{\text{Dir}}(\hat{\mathbf{d}}_i)}{Z_{\text{Dir}}(\mathbf{d})} + \sum_{i=1}^N \sum_{k=1}^K (\hat{d}_{ik} - d_k) (\psi(\hat{d}_{ik}) - \psi\left(\sum_{k=1}^K \hat{d}_{ik}\right)) \quad (\text{S12})
\end{aligned}$$

where  $Z_{\text{Dir}}(\cdot)$  is the normalizing parameter of Dirichlet distribution.

Finally,  $\mathcal{L}_1 = -\mathbb{E}_{q(X,\Phi,Z,\Omega)} (\log p(\mathbf{y}|X, \Phi, Z, \Omega))$  is derived as

$$\begin{aligned}
-\mathbb{E}_{q(X,\Phi,Z,\Omega)} (\log p(\mathbf{y}|X, \Phi, Z, \Omega)) &= - \int_{X,\Phi,Z} \log \prod_{i=1}^N \prod_{k=1}^K \mathcal{N}(x_{ik}, \phi_{ik}^{-1})^{z_{ik}} q(X|Z) q(\Phi|Z) q(Z) dX d\Phi dZ \\
&= - \int_{X,\Phi,Z} \sum_{i=1}^N \sum_{k=1}^K z_{ik} \left( -\frac{(x_{ik} - y_i)^2 \phi_{ik}}{2} - \frac{1}{2} \log 2\pi + \frac{\log \phi_{ik}}{2} \right) q(X|Z) q(\Phi|Z) q(Z) dX d\Phi dZ \\
&= - \int_{\Phi,Z} \sum_{i=1}^N \sum_{k=1}^K z_{ik} \left( -\frac{((\mu_{ik} - y_i)^2 + \sigma_{ik}^2) \phi_{ik}}{2} - \frac{1}{2} \log 2\pi + \frac{\log \phi_{ik}}{2} \right) q(\Phi|Z) q(Z) d\Phi dZ \\
&= - \int_Z \sum_{i=1}^N \sum_{k=1}^K z_{ik} \left( -\frac{((\mu_{ik} - y_i)^2 + \sigma_{ik}^2) \hat{\alpha}_{ik}}{2 \hat{\beta}_{ik}} - \frac{1}{2} \log 2\pi + \frac{\psi(\hat{\alpha}_{ik}) - \log \hat{\beta}_{ik}}{2} \right) q(Z) dZ \\
&= - \sum_{i=1}^N \sum_{k=1}^K \pi_{ik} \left( -\frac{((\mu_{ik} - y_i)^2 + \sigma_{ik}^2) \hat{\alpha}_{ik}}{2 \hat{\beta}_{ik}} + \frac{\psi(\hat{\alpha}_{ik}) - \log \hat{\beta}_{ik}}{2} \right) - C \quad (\text{S13})
\end{aligned}$$

Note that  $-C$  in  $\mathcal{L}_1$  and  $C$  in  $\mathcal{L}_2$  cancel out, so we simply ignore them in the main paper and the subsequent optimization.

## S2. More details and results of ScoreDVI

### S2.1. Network architectures and optimization

The four networks for representing the parameters of variational posteriors, i.e.,  $X$ -net,  $\Phi$ -net,  $Z$ -net and  $\Omega$ -net, are presented in detail in Figure S1. In practice, there are some restrictions on these variational posterior parameters. That is,

$$\sigma_{ik}^2 > 0, \hat{\alpha}_{ik} > 0, \hat{\beta}_{ik} > 0, \pi_{ik} \geq 0, \sum_{k=1}^K \pi_{ik} = 1, \hat{d}_{ik} > 0, i = \{1, \dots, N\}, k = \{1, \dots, K\} \quad (1)$$

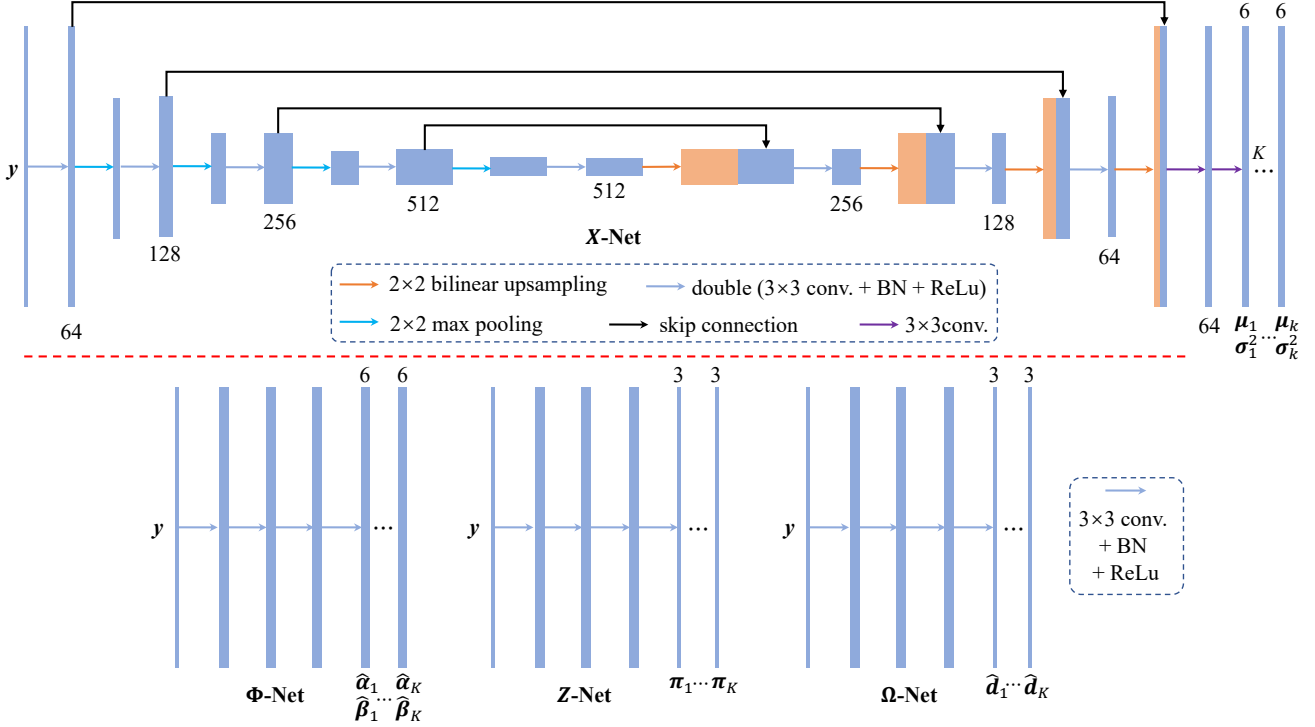

Figure S1: Architectures of four CNNs, i.e.,  $X$ -net,  $\Phi$ -net,  $Z$ -net and  $\Omega$ -net.  $X$ -net bases on U-net, while the other three nets build upon the DnCNN with 5 convolution layers.

To obtain  $\Theta$ , we output the logarithms of  $\sigma_{ik}^2$ ,  $\hat{\alpha}_{ik}$ ,  $\hat{\beta}_{ik}$ , and  $\hat{d}_{ik}$  using the four networks. We then obtain their actual values by applying exponential operations. As for  $\pi_{ik}$ , we apply the softmax operation channel-wise to the output of  $Z$ -net. This ensures that  $\pi_{ik} \geq 0$  and that  $\sum_{k=1}^K \pi_{ik} = 1$ .

Note that, we do not explicitly compute  $\pi_{ik} E_{q(x_{ik})} \log p(x_{ik})$  in  $\mathcal{L}_2$  but derive its derivative with respect to  $\mu_{ik}$  and  $\sigma_{ik}^2$  using score priors as discussed in the main paper. Note that no gradient of  $\pi_{ik}$  is returned from  $\pi_{ik} E_{q(x_{ik})} \log p(x_{ik})$ . Hence, we detach  $\pi_{ik}$  from this term and replace it with  $\pi_{ik} \cdot \text{detach} E_{q(x_{ik})} \log p(x_{ik})$  during optimization.

## S2.2. Denoising process and uncertainty quantification

The denoising process of our method is illustrated in Figure S2. Importantly, our method provides a natural way to estimate the uncertainty of the denoised image, which is particularly relevant in safety-critical scenarios. Specifically, our method estimates the variance of the posterior image distributions, denoted by  $\bar{\sigma}^2$ . As shown in Figure S2,  $\bar{\sigma}^2(t = 400)$  reflects the degree of uncertainty in the final restored image, especially the edges around the fine details.

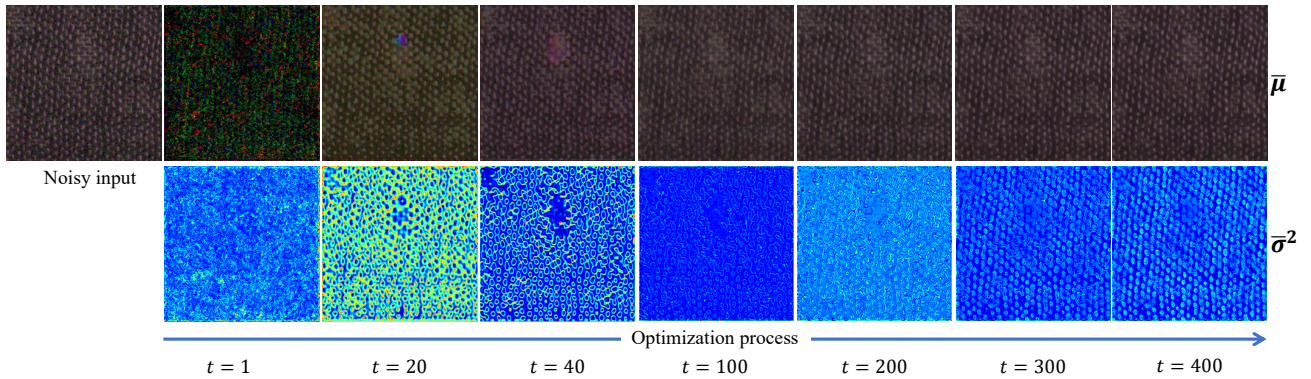

Figure S2: The denoising process of our ScoreDVI for real-world noise removal.

### S3. Image-wise fusion strategy

We consider the likelihood function as

$$p(\mathbf{y}|X, \Phi, \boldsymbol{\omega}) = \sum_{k=1}^K \omega_k \mathcal{N}(\mathbf{x}_k, \text{diag}(\boldsymbol{\phi}_k)^{-1}), \sum_{k=1}^K \omega_k = 1 \quad (\text{S14})$$

where  $\boldsymbol{\omega}$  is the mixing vector that combines  $K$  Gaussian components. Eq. (S14) can be equivalently expressed as

$$p(\mathbf{y}|X, \Phi, \mathbf{z}) = \prod_{k=1}^K \mathcal{N}(\mathbf{x}_k, \text{diag}(\boldsymbol{\phi}_k^{-1}))^{z_k}, p(\mathbf{z}|\boldsymbol{\omega}) = \prod_{k=1}^K \omega_k^{z_k}, \sum_{k=1}^K z_k = 1 \quad (\text{S15})$$

which allows modeling the image prior and the variational image posterior conditioned on  $\mathbf{z}$  as

$$p(X|\mathbf{z}) = \prod_{k=1}^K p(\mathbf{x})^{z_k}, q(X|\mathbf{z}) = \prod_{k=1}^K \mathcal{N}(\boldsymbol{\mu}_k, \boldsymbol{\sigma}_k^2)^{z_k}, q(\mathbf{z}) = \prod_{k=1}^K \pi_k \quad (\text{S16})$$

Therefore, the mean of variational image posteriors is  $\bar{\boldsymbol{\mu}} = \sum_{k=1}^K \pi_k \boldsymbol{\mu}_k$ , which is the image-wise fusion of different  $\boldsymbol{\mu}_k$ .

## S4. More visual comparisons

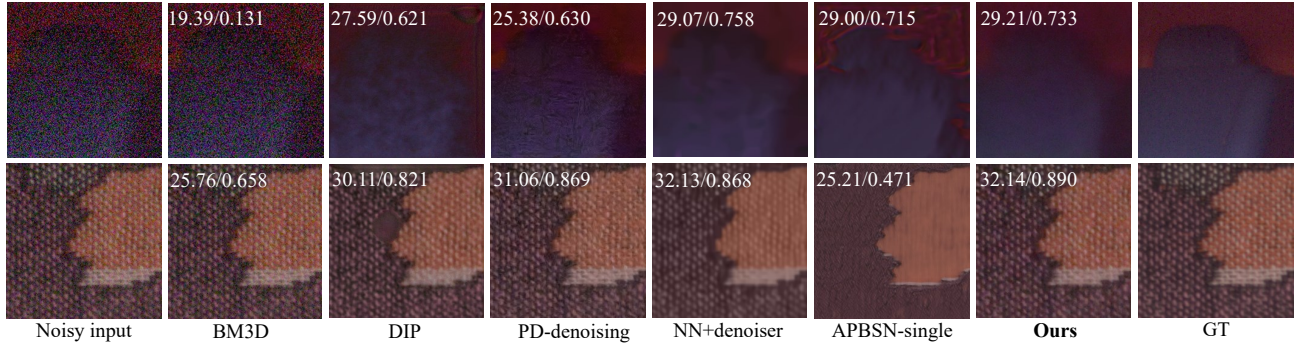

Figure S3: More visual comparisons of our method against other single image-based denoising methods in SIDD validation.

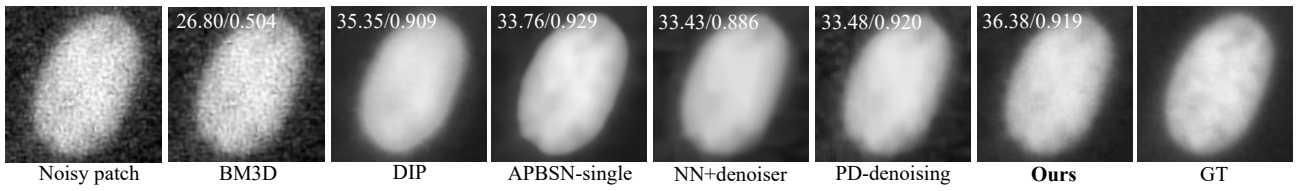

Figure S4: More visual comparisons of our method against other single image-based denoising methods in FMDD dataset. PSNR/SSIM are evaluated on the whole image. The noisy patch is from WideField\_BPAE\_B\_1.

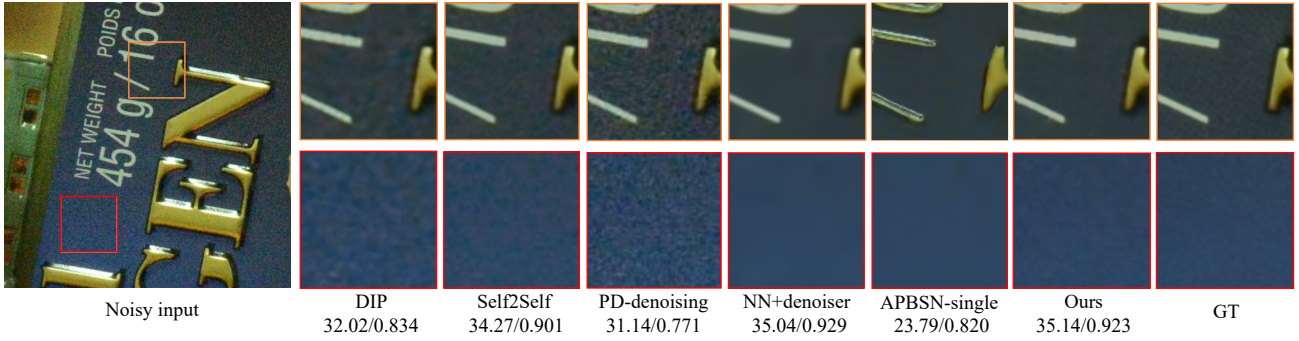

Figure S5: Visual comparisons of our method against other single image-based denoising methods in CC dataset.

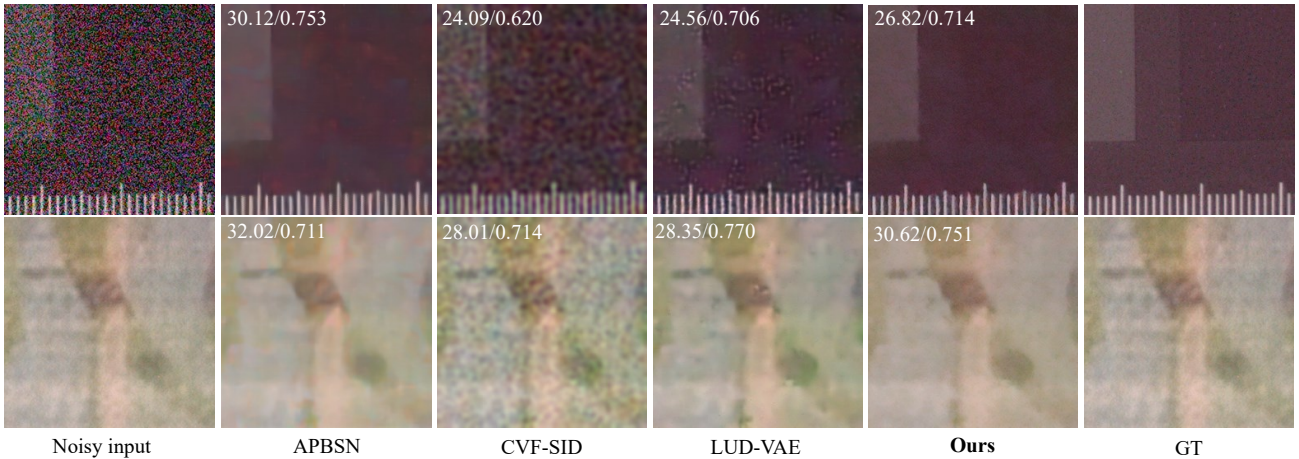

Figure S6: Visual comparisons of our method and other dataset-based denoising methods in SIDD validation dataset.

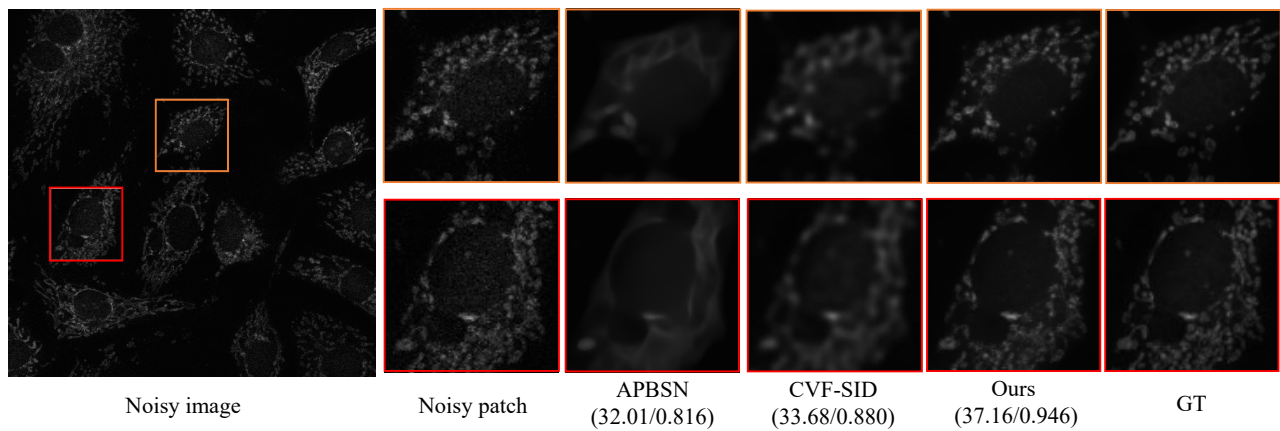

Figure S7: Visual comparisons of our method and other dataset-based denoising methods in FMDD dataset.

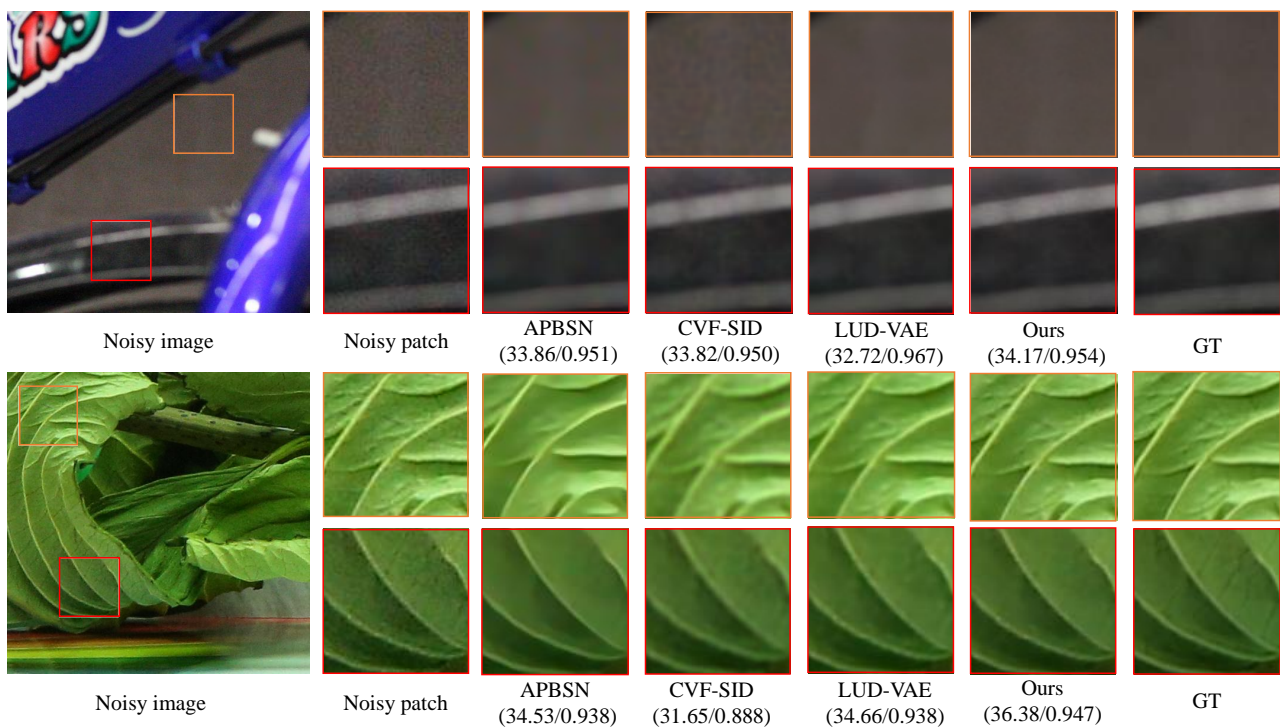

Figure S8: Visual comparisons of our method and other dataset-based denoising methods in PolyU (first row) and CC (second row) dataset.
